# Supplementary material
Source: publisher figshare collection journal article supplement (https://gsajournals.figshare.com/articles/dataset/_/6349553)
Supplement: Supplementary file 1 [file 1]

TABLE I: Supplementary table, five best three-gene trans-differentiation recipes for PN source clusters as ranked by RMSD. Taken from DBN inference results for all 518,592 possible combinations. Metrics summed over all  $74 - 3 = 71$  unperturbed genes.

|                                                                     |        |           |
|---------------------------------------------------------------------|--------|-----------|
| S-I $\rightarrow$ T-II (ref. RMSD = 0.3358 / Pearson R = 0.5853)    |        |           |
| Three-gene recipe                                                   | RMSD   | Pearson R |
| TESPA1 $\uparrow$ POU6F2 $\downarrow$ SATB2 $\uparrow$              | 0.1252 | 0.9666    |
| TESPA1 $\uparrow$ POU6F2 $\downarrow$ SLC6A1 $\downarrow$           | 0.1272 | 0.9699    |
| GAD1 $\downarrow$ TESPAl $\uparrow$ POU6F2 $\downarrow$             | 0.1281 | 0.9670    |
| CUX2 $\uparrow$ POU6F2 $\downarrow$ SATB2 $\uparrow$                | 0.1307 | 0.9619    |
| GAD1 $\downarrow$ CUX2 $\uparrow$ POU6F2 $\downarrow$               | 0.1338 | 0.9637    |
| S-I $\rightarrow$ T-III (ref. RMSD = 0.4884 / Pearson R = -0.2805)  |        |           |
| Three-gene recipe                                                   | RMSD   | Pearson R |
| ADARB2 $\downarrow$ GAD1 $\uparrow$ SATB2 $\downarrow$              | 0.0775 | 0.9596    |
| ADARB2 $\downarrow$ SLC6A1 $\uparrow$ SATB2 $\downarrow$            | 0.0825 | 0.9591    |
| ADARB2 $\downarrow$ GRIK3 $\uparrow$ SATB2 $\downarrow$             | 0.0894 | 0.9639    |
| ERBB4 $\uparrow$ ADARB2 $\downarrow$ SATB2 $\downarrow$             | 0.0915 | 0.9547    |
| ADARB2 $\downarrow$ GRIP1 $\uparrow$ SATB2 $\downarrow$             | 0.0958 | 0.9483    |
| S-I $\rightarrow$ T-IV (ref. RMSD = 0.5704 / Pearson R = -0.5077)   |        |           |
| Three-gene recipe                                                   | RMSD   | Pearson R |
| ERBB4 $\uparrow$ ADARB2 $\uparrow$ SATB2 $\downarrow$               | 0.1165 | 0.9589    |
| ADARB2 $\uparrow$ SLC6A1 $\uparrow$ SATB2 $\downarrow$              | 0.1179 | 0.9513    |
| ADARB2 $\uparrow$ GAD1 $\uparrow$ SATB2 $\downarrow$                | 0.1183 | 0.9446    |
| KIAA12117 $\downarrow$ ADARB2 $\uparrow$ SATB2 $\downarrow$         | 0.1289 | 0.9556    |
| ADARB2 $\uparrow$ GRIP1 $\uparrow$ SATB2 $\downarrow$               | 0.1295 | 0.9491    |
| S-II $\rightarrow$ T-I (ref. RMSD = 0.3358 / Pearson R = 0.5853)    |        |           |
| Three-gene recipe                                                   | RMSD   | Pearson R |
| GAD1 $\downarrow$ TESPAl $\downarrow$ POU6F2 $\uparrow$             | 0.0723 | 0.9812    |
| GAD1 $\downarrow$ CUX2 $\downarrow$ POU6F2 $\uparrow$               | 0.0751 | 0.9824    |
| CUX2 $\downarrow$ SLIT3 $\downarrow$ POU6F2 $\uparrow$              | 0.0761 | 0.9878    |
| PDZD2 $\downarrow$ CUX2 $\downarrow$ POU6F2 $\uparrow$              | 0.0765 | 0.9864    |
| ERBB4 $\downarrow$ TESPAl $\downarrow$ POU6F2 $\uparrow$            | 0.0768 | 0.9802    |
| S-II $\rightarrow$ T-III (ref. RMSD = 0.5655 / Pearson R = -0.4221) |        |           |
| Three-gene recipe                                                   | RMSD   | Pearson R |
| ADARB2 $\downarrow$ GAD1 $\uparrow$ SATB2 $\downarrow$              | 0.0794 | 0.9581    |
| ADARB2 $\downarrow$ SLC6A1 $\uparrow$ SATB2 $\downarrow$            | 0.0891 | 0.9551    |
| ADARB2 $\downarrow$ GRIP1 $\uparrow$ SATB2 $\downarrow$             | 0.0994 | 0.9450    |
| ERBB4 $\uparrow$ ADARB2 $\downarrow$ SATB2 $\downarrow$             | 0.1033 | 0.9471    |
| GRIK3 $\uparrow$ SLC6A1 $\uparrow$ SATB2 $\downarrow$               | 0.1047 | 0.9383    |
| S-II $\rightarrow$ T-IV (ref. RMSD = 0.6125 / Pearson R = -0.5156)  |        |           |
| Three-gene recipe                                                   | RMSD   | Pearson R |
| ADARB2 $\uparrow$ GAD1 $\uparrow$ SATB2 $\downarrow$                | 0.1230 | 0.9405    |
| ADARB2 $\uparrow$ SLC6A1 $\uparrow$ SATB2 $\downarrow$              | 0.1249 | 0.9482    |
| ERBB4 $\uparrow$ ADARB2 $\uparrow$ SATB2 $\downarrow$               | 0.1286 | 0.9541    |
| ADARB2 $\uparrow$ GRIP1 $\uparrow$ SATB2 $\downarrow$               | 0.1327 | 0.9477    |
| KIAA1211L $\downarrow$ ADARB2 $\uparrow$ SATB2 $\downarrow$         | 0.1422 | 0.9503    |

TABLE II: Supplementary table, five best three-gene trans-differentiation recipes as ranked by RMSD. Taken from DBN inference results for all 518,592 possible combinations. Metrics summed over all  $74 - 3 = 71$  unperturbed genes.

|                                                                     |        |           |
|---------------------------------------------------------------------|--------|-----------|
| S-III $\rightarrow$ T-I (ref. RMSD = 0.4884 / Pearson R = -0.2805)  |        |           |
| Three-gene recipe                                                   | RMSD   | Pearson R |
| GAD1 $\downarrow$ POU6F2 $\uparrow$ SATB2 $\uparrow$                | 0.0986 | 0.9643    |
| ERBB4 $\downarrow$ POU6F2 $\uparrow$ SATB2 $\uparrow$               | 0.1072 | 0.9610    |
| GAD1 $\downarrow$ CUX2 $\downarrow$ SATB2 $\uparrow$                | 0.1072 | 0.9598    |
| GAD1 $\downarrow$ TESPA1 $\downarrow$ SATB2 $\uparrow$              | 0.1080 | 0.9556    |
| POU6F2 $\uparrow$ SLC6A1 $\downarrow$ SATB2 $\uparrow$              | 0.1122 | 0.9580    |
| S-III $\rightarrow$ T-II (ref. RMSD = 0.5655 / Pearson R = -0.4221) |        |           |
| Three-gene recipe                                                   | RMSD   | Pearson R |
| GAD1 $\downarrow$ POU6F2 $\downarrow$ SATB2 $\uparrow$              | 0.1564 | 0.9381    |
| GRIP1 $\downarrow$ POU6F2 $\downarrow$ SATB2 $\uparrow$             | 0.1571 | 0.9443    |
| POU6F2 $\downarrow$ SLC6A1 $\downarrow$ SATB2 $\uparrow$            | 0.1611 | 0.9353    |
| ERBB4 $\downarrow$ POU6F2 $\downarrow$ SATB2 $\uparrow$             | 0.1630 | 0.9319    |
| TESPA1 $\uparrow$ POU6F2 $\downarrow$ SATB2 $\uparrow$              | 0.1635 | 0.9446    |
| S-III $\rightarrow$ T-IV (ref. RMSD = 0.3832 / Pearson R = 0.2390)  |        |           |
| Three-gene recipe                                                   | RMSD   | Pearson R |
| NFIB $\uparrow$ ADARB2 $\uparrow$ SATB2 $\downarrow$                | 0.0981 | 0.9742    |
| ADARB2 $\uparrow$ GRIK3 $\downarrow$ SATB2 $\downarrow$             | 0.0987 | 0.9750    |
| ADARB2 $\uparrow$ GRIK3 $\downarrow$ SATB2 $\downarrow$             | 0.0993 | 0.9812    |
| ERBB4 $\uparrow$ ADARB2 $\uparrow$ GRIK3 $\downarrow$               | 0.1013 | 0.9776    |
| ERBB4 $\uparrow$ ADARB2 $\uparrow$ GAD1 $\uparrow$                  | 0.1013 | 0.9610    |
| S-IV $\rightarrow$ T-I (ref. RMSD = 0.5704 / Pearson R = -0.5077)   |        |           |
| Three-gene recipe                                                   | RMSD   | Pearson R |
| GAD1 $\downarrow$ POU6F2 $\uparrow$ SATB2 $\uparrow$                | 0.1014 | 0.9635    |
| ERBB4 $\downarrow$ POU6F2 $\uparrow$ SATB2 $\uparrow$               | 0.1100 | 0.9600    |
| GAD1 $\downarrow$ CUX2 $\downarrow$ SATB2 $\uparrow$                | 0.1113 | 0.9578    |
| GAD1 $\downarrow$ TESPA1 $\downarrow$ SATB2 $\uparrow$              | 0.1124 | 0.9532    |
| ERBB4 $\downarrow$ CUX2 $\downarrow$ SATB2 $\uparrow$               | 0.1140 | 0.9602    |
| S-IV $\rightarrow$ T-II (ref. RMSD = 0.6125 / Pearson R = -0.5156)  |        |           |
| Three-gene recipe                                                   | RMSD   | Pearson R |
| GAD1 $\downarrow$ POU6F2 $\downarrow$ SATB2 $\uparrow$              | 0.1610 | 0.9351    |
| GRIP1 $\downarrow$ POU6F2 $\downarrow$ SATB2 $\uparrow$             | 0.1624 | 0.9412    |
| ERBB4 $\downarrow$ POU6F2 $\downarrow$ SATB2 $\uparrow$             | 0.1664 | 0.9291    |
| POU6F2 $\downarrow$ CBLN2 $\downarrow$ SATB2 $\uparrow$             | 0.1666 | 0.9310    |
| KIAA1211L $\uparrow$ POU6F2 $\downarrow$ SATB2 $\uparrow$           | 0.1684 | 0.9293    |
| S-IV $\rightarrow$ T-III (ref. RMSD = 0.3832 / Pearson R = 0.2390)  |        |           |
| Three-gene recipe                                                   | RMSD   | Pearson R |
| ADARB2 $\downarrow$ GRIK3 $\uparrow$ SATB2 $\downarrow$             | 0.0581 | 0.9784    |
| NFIB $\downarrow$ ADARB2 $\downarrow$ SLC6A1 $\uparrow$             | 0.0592 | 0.9781    |
| NFIB $\downarrow$ ADARB2 $\downarrow$ GAD1 $\uparrow$               | 0.0595 | 0.9772    |
| ADARB2 $\downarrow$ GRIK3 $\uparrow$ SLC6A1 $\uparrow$              | 0.0605 | 0.9795    |
| ADARB2 $\downarrow$ GAD1 $\uparrow$ GRIK3 $\uparrow$                | 0.0618 | 0.9788    |
